# Supplementary material for: Factors controlling oxophilicity and carbophilicity of transition metals and main group metals
Source: Royal Society of Chemistry journal article supplement (doi:10.1039/d1ta06453c), 2021-01-01
Supplement: d1ta06453c1.csv [file d1ta06453c1.csv]

element	dCenter	vas2	vas2f	vad2	vad2f	Rpf	hydroxyl_ adsorption_energy	methyl_adsorption_energy	oxygen_adsorption_energy	carbon_adsorption_energy	carbon_subsurface	oxide_formation_energy	carbide_formation_energy	nitride_formation_energy	sulfide_formation_energy
Al	0	25.99386554	5.198773108	0	0	-0.3354	-3.92097843	-1.93787783	-7.83427665	-6.46904931	0	-3.473	-0.306	-1.648	-1.344
Cd	-4	17.1100685	17.1100685	0.91051949	0.91051949	-0.402	-2.46266238	-1.08010497	-4.59730357	-3.59626502	0	-1.342			-0.774
Ga	-2.801869304	24.20725086	4.841450172	0.579057162	0.115811432	-0.1098	-3.12956098	-1.49787632	-5.80267885	-5.05635739	0	-2.261		-0.568	-1.084
In	-2.368034572	16.01705865	3.203411731	0.700729869	0.140145974	-0.0676	-2.82201932	-1.24342067	-5.40970871	-4.16970738	0	-1.913		-0.5	-0.737
Mg	0	19.04704229	19.04704229	0	0	-2.36	-3.5963035	-1.27621064	-7.4866911	-6.65515342	1	-3.118		-0.957	-1.803
Ag	-3.986328213	18.20552242	18.20552242	1.207219812	1.207219812	0.7996	-2.14059008	-1.04458664	-3.92123017	-3.643782	0	-0.108			-0.113
Au	-3.349091545	20.71412516	20.71412516	2.211523167	2.211523167	1.69	-1.85694367	-1.32859063	-3.478128	-4.544267	0	-0.007
Cr	-1.714082357	26.27117412	13.13558706	2.371796654	1.185898327	-0.445	-4.52650577	-2.14197543	-7.73989584	-8.08967899	0	-2.364	-0.177	-0.606	-0.7
Cu	-2.457091419	26.59369735	26.59369735	0.999650069	0.999650069	0.339	-2.62246244	-1.34119881	-5.14635617	-5.066865	0	-0.807			-0.285
Fe	-1.758214554	26.78763709	18.75134596	1.723518706	1.206463094	-0.308	-3.47767246	-1.9289245	-6.64911116	-7.68906083	0	-1.71		-0.013	-0.588
Hf	-1.429976888	17.50266655	5.250799966	4.386087781	1.315826334	-0.465	-4.71780075	-1.85358816	-9.47557617	-7.795925	0	-3.854	-1.193	-1.913
Hg	-4	17.89176304	17.89176304	1.56344298	1.56344298	0.852	-2.14848109	-0.89068703	-2.66263848	-2.42091815	1	-0.471			-0.306
Ir	-2.937560536	20.69117966	16.55294373	2.698710418	2.158968335	0.92	-2.7866218	-1.97822084	-5.15039917	-7.07257	0	-0.862			-0.46
Mn	-1.823859532	25.43086941	15.25852165	1.954961892	1.172977135	-0.7092	-4.14980498	-2.24739917	-8.8879004	-9.55900906	1	-2.053	-0.094		-1.11
Mo	-2.177857184	20.45951427	10.22975714	3.629705379	1.81485269	-0.1	-4.35641857	-2.16897099	-7.47046732	-7.89251341	0	-2.036	-0.184	-0.24	-0.954
Ni	-1.678127517	29.40066894	26.46060205	1.417950257	1.276155232	-0.2124	-2.77120366	-1.69762662	-5.76508717	-6.81289	0	-1.242			-0.455
Os	-3.00923411	19.54781301	13.68346911	2.798452677	1.958916874	0.595	-3.21966344	-1.92340232	-5.66414617	-7.034455	0	-1.019			-0.51
Pb	-2.464723538	13.51035089	4.053105266	0.843938869	0.253181661	-0.0378	-2.71309869	-1.10526586	-4.90452882	-3.60440228	0	-1.133			-0.515
Pd	-1.839449278	23.78631137	21.40768023	2.270998326	2.043898493	0.8235	-2.36075026	-1.74353259	-4.78746817	-7.012566	0	-0.598			-0.366
Pt	-2.438240086	22.88137636	20.59323873	2.873787159	2.586408443	1.0692	-2.39050496	-2.08683747	-4.59140917	-7.206078	0	-0.57			-0.431
Re	-2.303472663	18.89987674	11.33992605	3.159422945	1.895653767	0.18	-3.43862264	-1.65562446	-6.45435217	-7.57285	0	-1.526			-0.617
Rh	-2.246607782	22.20784138	17.7662731	2.352623981	1.882099185	0.608	-2.80395437	-1.87521655	-5.43771817	-7.153106	0	-0.737
Ru	-2.511204192	19.9332995	13.95330965	2.323230563	1.626261394	0.56	-3.14978067	-1.80539065	-5.87924617	-7.091735	0	-1.054			-0.711
Sc	-0.663814623	16.27532928	3.255065856	2.683508691	0.536701738	-0.418	-4.95347114	-1.84694068	-9.63222804	-7.18897732	0	-3.956		-1.626
Ta	-1.453113771	19.65277631	7.861110523	4.71050065	1.88420026	-0.24	-5.14776325	-2.55108764	-8.33903947	-8.93641851	0	-3.034	-0.747	-1.307	-1.223
Tc	-2.044573657	18.15691981	9.078459907	2.337366488	1.168683244	-0.237	-3.17872156	-1.53850123	-6.84249911	-7.69336764	0	-1.496
Ti	-1.147634251	21.49070603	6.447211808	2.883837543	0.865151263	-0.48	-4.59012763	-1.87569799	-9.16497317	-7.405829	0	-3.261	-0.963	-1.75	-1.373
Tl	-2.443215362	12.56178822	2.512357643	0.791433803	0.158286761	-0.0672	-2.48880648	-0.94261706	-4.6394644	-3.12357778	0	-0.802			-0.328
V	-1.118354567	24.44464789	9.777859157	2.699359212	1.079743685	-0.45	-5.07266547	-2.48882737	-8.39125176	-8.54708825	0	-2.522	-0.509	-1.125
W	-2.352407068	21.1536909	10.57684545	4.561395832	2.280697916	-0.06	-4.43499628	-2.18705684	-7.55089686	-7.99979671	0	-2.184	-0.207		-0.896
Zn	-4	25.51865404	25.51865404	0.773185257	0.773185257	-0.7628	-2.63948449	-1.20724451	-5.52949552	-4.18921137	0	-1.816
Zr	-1.264502656	16.41716264	4.925148791	4.005805355	1.201741606	-0.435	-4.58477543	-1.85867025	-9.22163717	-7.717777	0	-3.801	-1.019		-1.993
Li	0	22.19765447	11.09882724	0	0	-1.52	-4.21602345	-1.4229885	-8.87791574	-6.43108119	1	-2.066		-0.512	-1.542
Be	0	33.45794073	33.45794073	0	0	-1.968	-3.15602329	-1.17870919	-7.12050181	-5.23599708	0	-3.158	-0.314	-1.219	-1.223
Na	0	12.05155682	6.025778409	0	0	-1.357	-3.56355066	-0.92246795	-6.83953545	-4.0958099	1	-1.444			-1.247
K	0	7.123302777	3.561651388	0	0	-1.468	-3.50116977	-0.83174344	-6.45141242	-3.55898175	1	-1.25			-1.301
Sn	-2.646091848	16.93951958	5.081855875	0.689143891	0.206743167	-0.0423	-3.02680101	-1.46036891	-5.50952077	-4.95781584	1	-1.455			-0.568
Rb	-0.392085529	5.979407759	2.989703879	1.80932449	0.904662245	-1.4715	-3.43183393	-0.81633611	-6.36058357	-3.40163763	1	-1.168			-1.203
Sr	-0.701131247	9.511076154	9.511076154	3.100435772	3.100435772	-2.889	-4.51511399	-1.56251423	-8.56861978	-6.88516923	1	-3.063		-0.811	-2.487
Y	-0.717268214	12.65398275	2.530796549	3.573795981	0.714759196	-0.476	-4.98442431	-1.92389072	-9.41461093	-8.71924434	1	-3.949	-0.33	-1.55	-2.384
Cs	-0.304715276	5.403272838	2.701636419	1.515354469	0.757677234	-1.513	-3.57513197	-0.89767412	-6.71260199	-3.38394364	1	-1.197	-0.4716		-1.182
Ca	0	11.58822264	11.58822264	0	0	-2.868	-4.50119904	-1.52242805	-8.77292741	-7.46777057	1	-3.29		-0.893	-2.462
Co	-2.098291159	28.25492781	22.60394225	1.622245056	1.297796045	-0.2256	-3.13777329	-1.78771071	-5.84218136	-6.26318563	0	-1.233			-0.53
Ba	-0.414060709	7.864419799	7.864419799	2.222990156	2.222990156	-2.906	-4.34766369	-1.49895599	-8.18951863	-6.18949495	1	-2.84			-2.436
Nb	-1.332591265	19.0330162	7.61320648	3.881763463	1.552705385	-0.4396	-4.9490808	-2.38294951	-8.21216008	-8.55981459	0	-2.812	-0.72	-1.218
Bi	-1.769322875	14.76480409	7.382402046	0.924214476	0.462107238	0.154	-2.95656858	-1.66475567	-5.09167979	-4.53283152	0	-1.182			-0.297
